# Supplementary material for: Analysis of Repair Mechanisms following an Induced Double-Strand Break Uncovers Recessive Deleterious Alleles in the Candida albicans Diploid Genome
Source: PubMed Central journal article supplement (PMC5061868; doi:10.1128/mbio.01109-16), 2016-10-11
Supplement: mbo005163014s1.pdf [file mbo005163014s1.pdf]

## Text S1 – Supplementary Material and Methods

### *Plasmid constructions*

*pTet-I-SceI-HYGb-XOG1HOLI* harbors the *I-SceI* gene under the control of a tetracycline inducible promoter (56), the hygromycin B resistance gene (88) and a sequence that allows its integration at the *XOG1-HOLI* intergenic region on chromosome 1 (Chr1). To generate this plasmid, *CIpOp2*, a *CIp10* derivative containing the *Tet-on* promoter (56) was digested with *EcoRV* to excise the Gateway® Cassette and allowed to religate (*pTet-w/oGTW*). The resulting plasmid was digested with *NotI* to excise the *URA3* marker and the *RPS1* sequences and recircularized, yielding *pTet-w/oGTW-w/oURA3*. The *HYGb* gene was excised from *pKS-ACT1p-HYGb* (88) by *XbaI* and *Acc65I*, blunt-ended with the Klenow enzyme (Invitrogen™) and cloned into the *AleI*-linearized *pTet-w/oGTW-w/oURA3* plasmid, yielding *pTet-w/oGTW-HYGb*. Then, a 1kb sequence from the intergenic region between *XOG1* and *HOLI* genes was amplified by PCR with oligonucleotides AF1 and AF2 (Table S2). The PCR product was digested with *NaeI* and ligated into the *NaeI*-linearized *pTet-w/oGTW-HYGb* plasmid yielding *pTet-w/oGTW-HYGb-XOG1HOLI*. Finally, as *C. albicans* is part of the CTG clade (89), we used <http://genomes.urv.es/OPTIMIZER/> website (90) to optimize the *I-SceI* meganuclease gene sequence to the *C. albicans* codon usage. The optimized *I-SceI* gene flanked by *NsiI* and *EcoRV* restriction sites was synthesized by GeneArt® Invitrogen™, and cloned into the *pTet-w/oGTW-HYGb-XOG1HOLI* plasmid linearized with *NsiI* and *EcoRV* to yield *pTet-I-SceI-HYGb-XOG1HOLI*.

*pTet-NLS-I-SceI-HYGb-XOG1HOLI* was constructed by using the Nuclear Localization Sequence (NLS) from SV40 (91) carrying a region recognized by Importin  $\alpha$  (92) and which has already been used in *C. albicans* (93). We used the <http://genomes.urv.es/OPTIMIZER/> website to optimize the codon usage for *C. albicans* as follow: ATG CCA CCA AAA AAA AAA AGA AAA GTT CAT. We fused this modified NLS sequence to *I-SceI* by PCR using

primers AF27 and AF31 (Table S2), and p*Tet-I-SceI-HYGb-XOG1HOL1* as a template. The PCR fragment was cloned into a TOPO®-TA vector (ThermoFisher), digested with *EcoRV* and *NsiI* and cloned into p*Tet-I-SceI-HYGb-XOG1HOL1* digested with the same enzymes, yielding p*Tet-NLS-I-SceI-HYGb-XOG1HOL1*.

pFA-I-*SceI*-TS-*URA3*-*CDR3/tG(GCC)2* carries the I-*SceI* recognition sequence, the *URA3* marker and two sequences that allow integration in the *CDR3/tG(GCC)2* intergenic region on Chr4. To obtain this plasmid, we first amplified two sequences in the intergenic region between *CDR3* and *tG(GCC)2* genes. The first region at position 775,906-776,737, closer to *CDR3*, is 831bp long and was amplified by PCR with oligonucleotides AF6 and AF7 (Table S2). The second region at position 778,136-779,189, closer to *tG(GCC)2*, is 1,055bp long and was amplified by PCR with oligonucleotides AF8 and AF9, containing the I-*SceI* target sequence (attaccctgtatcccta, Table S2). The *SacII*+*HpaI*-digested AF6/AF7 PCR product was inserted at the *SacII* and *HpaI* sites of pFA-*CaURA3* (94), carrying the *URA3* gene. The resulting plasmid was then double-digested with *HindIII*+*PstI* to insert the *HindIII*+*PstI*-cut AF8/AF9 PCR product. The resulting plasmid was named pFA-I-*SceI*-TS-*URA3*-*CDR3/tG(GCC)2*.

The p*CaTDH3*-GTW-*LEU2* plasmid carries the sequence for integration at the *RPS1* locus on Chr1, the *C. maltosa* optimized *LEU2* marker and a Gateway® Cassette flanked by the *attR* sequences and under the control of the *P<sub>TDH3</sub>* constitutive promoter. To obtain this plasmid, the vector pFA-*CmLEU2* (95) was digested with *PvuII* and *SpeI*, the band corresponding to the *LEU2* marker was purified and cloned into the *AleI*-*SpeI* double-digested p*CaTDH3*-GTW-*URA3* plasmid (51). The resulting plasmid was called p*CaTDH3*-GTW-*LEU2*.

p*CaTDH3*-*GPII6*-*LEU2* was constructed by using the Gateway® Technology as described in Chauvel *et al.* (56) by LR recombination between the BP vector containing orf19.2677 (*GPII6*) and the destination vector p*CaTDH3*-GTW-*LEU2*.

pCaTDH3-MRF2-URA3 was constructed by cloning orf19.1303 (*MRF2*) under the control of a constitutive promoter in pCaTDH3-GTW-URA3, a ClpOp2 derivative plasmid (51). This plasmid was digested with *BsrGI* to excise the Gateway® Cassette and allowed to religate, resulting in pCaTDH3-URA3. orf19.1303 was amplified by PCR using primers AF49 and AF50 (Table S2) containing *EcoRV* and *MluI-NaeI* restriction sites at the 3' and 5' ends, respectively. The PCR amplified DNA was gel purified and cloned into a TOPO®-TA vector. Sequencing was performed to select the TOPO-TA-MRF2 clone carrying the full-length allele. The *MRF2* gene was excised from the TOPO-TA-MRF2 vector by *EcoRV-MluI* digestion and cloned into the pCaTDH3-URA3 plasmid linearized with *EcoRV-MluI*, yielding pCaTDH3-MRF2-URA3.

pCaMRF2-MRF2-URA3 was obtained by replacing the  $P_{TDH3}$  promoter from pCaTDH3-MRF2-URA3 by the endogenous *MRF2* promoter. The promoter of *MRF2* was PCR amplified with AF113 and AF114 (Table S2) containing *EcoRV* and *MluI-NaeI* restriction sites at the 3' and 5' ends. The PCR product was gel purified and cloned into a TOPO®-TA vector. The *MRF2* promoter was excised from the TOPO®-TA-pCaMRF2 vector by *XhoI*, *PvuII* and *DraIII* digestion and cloned into the *XhoI-EcoRV* double-digested pCaTDH3-MRF2-URA3 plasmid to replace the  $P_{TDH3}$  promoter yielding pCaMRF2-MRF2-URA3.

### ***Strain constructions***

CEC2684 was first transformed with *SacII-KpnI*-digested pNIMX (56) to introduce the transactivator for the *Tet*-on promoter (56). pNIMX (56) is a pNIM1 derivative (96) and integrates at the *ADH1* locus on Chr5. Transformants were selected on nourseothricin-containing media (300µg/mL) (97) and validated by PCR with the ADH1verif and NIM1verif primers (Table S2), giving rise to CEC3867. CEC3867 was then transformed with the *PmlI*-linearized p*Tet*-NLS-*I-SceI-HYGb-XOG1HOL1* or p*Tet*-w/oGTW-*HYGb-XOG1HOL1*

plasmids, which integrate at the *XOG1-HOL1* intergenic region of Chr1. After selection on hygromycin B-containing plates (700µg/mL) (88), we obtained CEC4021 and CEC3888, respectively. Finally, CEC4021 was transformed with *NcoI-HindIII*-digested pFA-I-*SceI*-TS-*URA3-CDR3/tG(GCC)2*, integrating at the *CDR3-tG(GCC)2* intergenic region, on Chr4, located 302,518Kb away from the *PGA59-PGA62* locus and 214,361Kb away from the centromere, yielding the CEC4012 (“I-*SceI* + TargetB”) or CEC4088 (“I-*SceI* + TargetA”) strains. We also constructed a first control strain that carries only the inducible *I-SceI* gene, but no *I-SceI* recognition sequence. Because of uridine auxotrophy, this control strains was transformed with the *StuI*-digested CIP10 plasmid (98) that integrates at the *RPS1* locus on Chr1 yielding CEC4045 (“I-*SceI* only”). The second control strain, carrying only the *I-SceI* target sequence but no *I-SceI* gene, CEC3930 (“Target only”), was obtained by transforming CEC3888 with the pFA-I-*SceI*-TS-*URA3-CDR3/tG(GCC)2* construction.

To obtain the strain overexpressing *GPI16* with or without the *MRF2* gene, we first transformed CEC4012 and CEC4088 with pCa*TDH3-GPI16-LEU2*, yielding CEC4429 and CEC4430 respectively. Subsequently, a small colony derived from CEC4430 having lost the *I-SceI* target sequence-bearing chromosome was transformed with the pCa*TDH3-MRF2-URA3* or pCa*MRF2-MRF2-LEU2* plasmids, leading to CEC4797 and CEC4798.
